# Supplementary material for: Fetal programming: in utero exposure to acrylamide leads to intergenerational disrupted ovarian function and accelerated ovarian aging
Source: publisher site journal article supplement (doi:10.18632/aging.204269), 2022-09-06
Supplement: Supplementary file [file aging-v14i17-204269-supplementary-material-SD1.pdf]

## SUPPLEMENTARY FIGURES

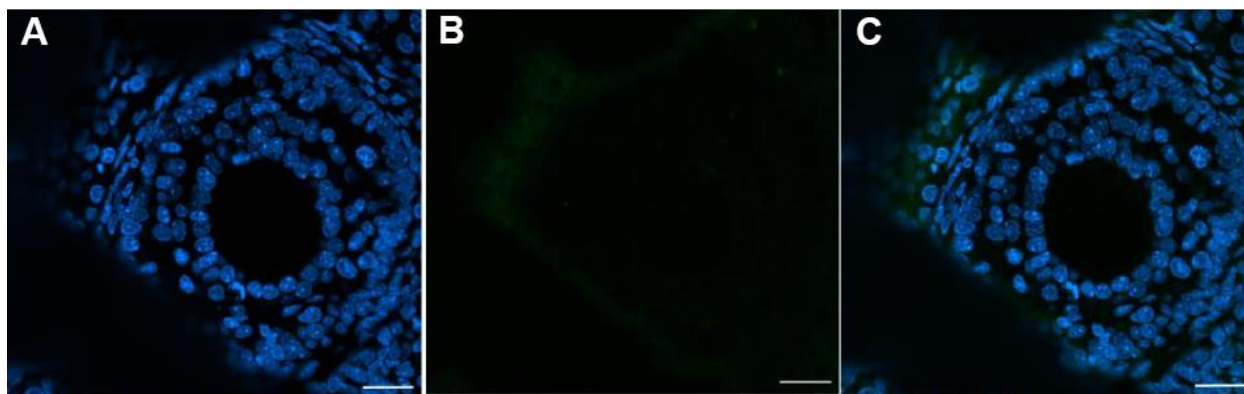

**Supplementary Figure 1.** The ovarian CYP19 localization and expression in 4-week-old females of negative control. (A) stained with Hoechst, (B) stained with FITC conjugated secondary antibody, and primary antibody was replaced with PBS, (C) merged image stained with Hoechst and FITC.

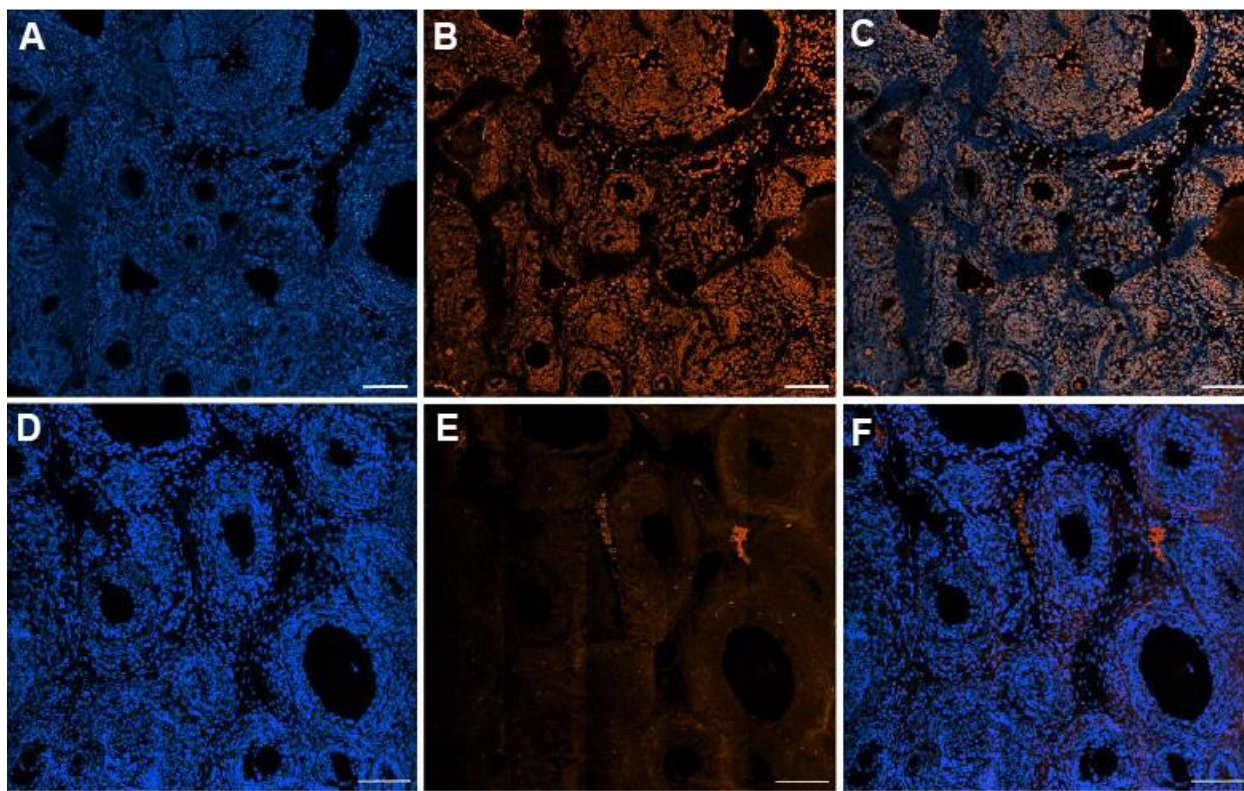

**Supplementary Figure 2.** The TUNEL reaction in 4-week-old females of positive control (A–C), and negative control (D–F).
